# Supplementary material for: Characterization and Advancement of an Evaluation Method for the Treatment of Spontaneous Osteoarthritis in STR/ort Mice: GRGDS Peptides as a Potential Treatment for Osteoarthritis
Source: MDPI journal article supplement (doi:10.3390/biomedicines11041111), 2023-04-06
Supplement: s1 [file s1]

## Supplementary Information

Supplementary information accompanies this paper at additional files.

Additional files:

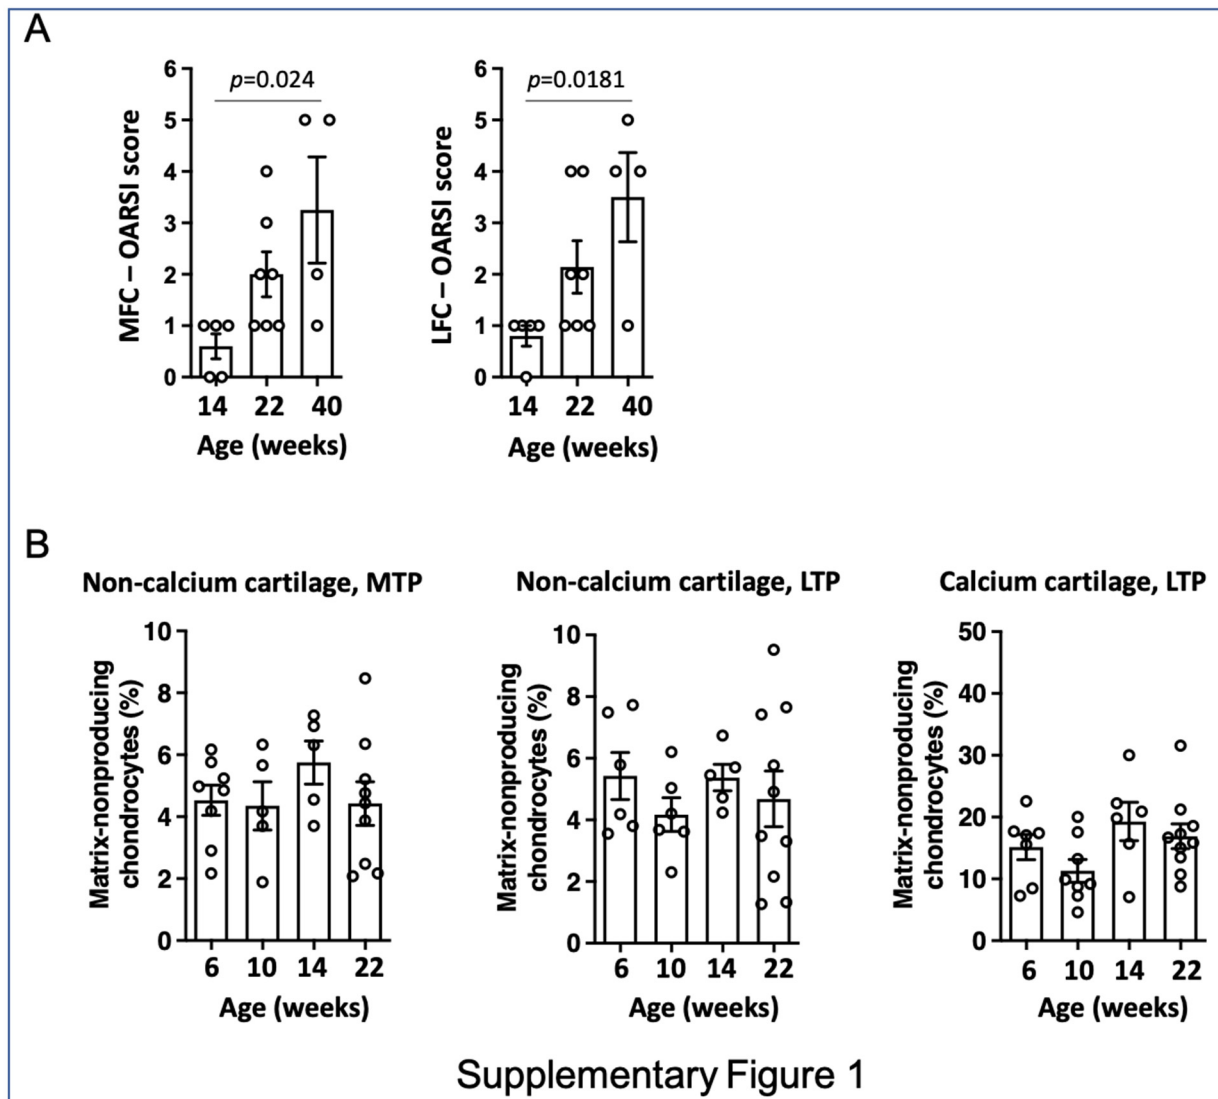

**Supplementary Figure S1.** The articular cartilage of male STR/ort mice showing varying OARS score with age.



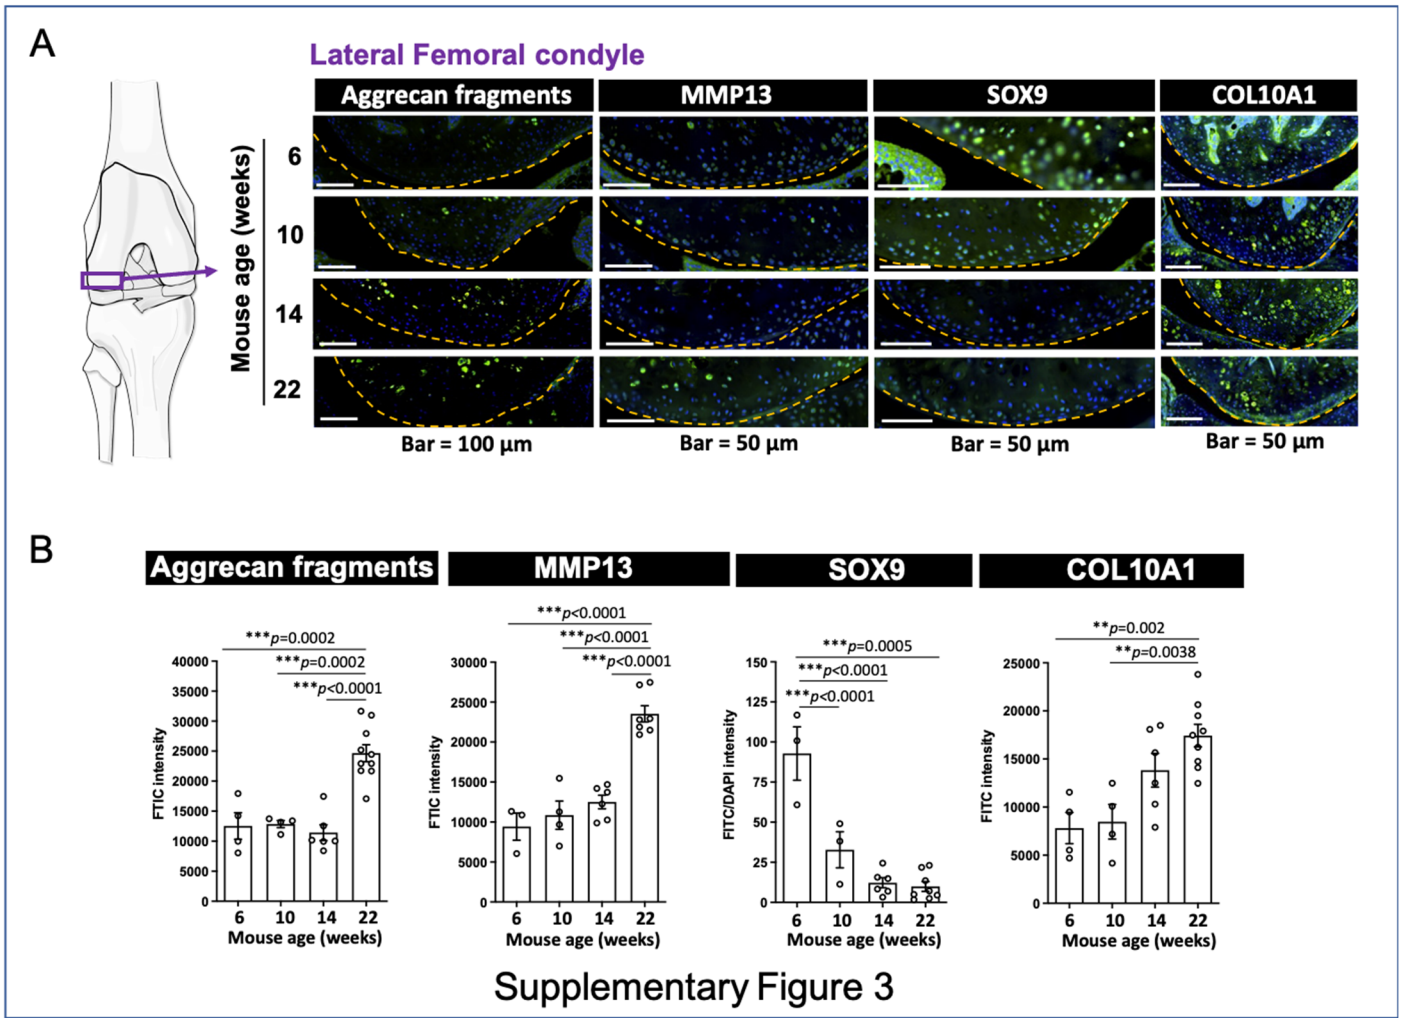

**Supplementary Figure S3.** Changed expression level of aggrecan fragments, MMP-13, Sox9, and COL10A1 expression associated with age is detected in OA cartilage.

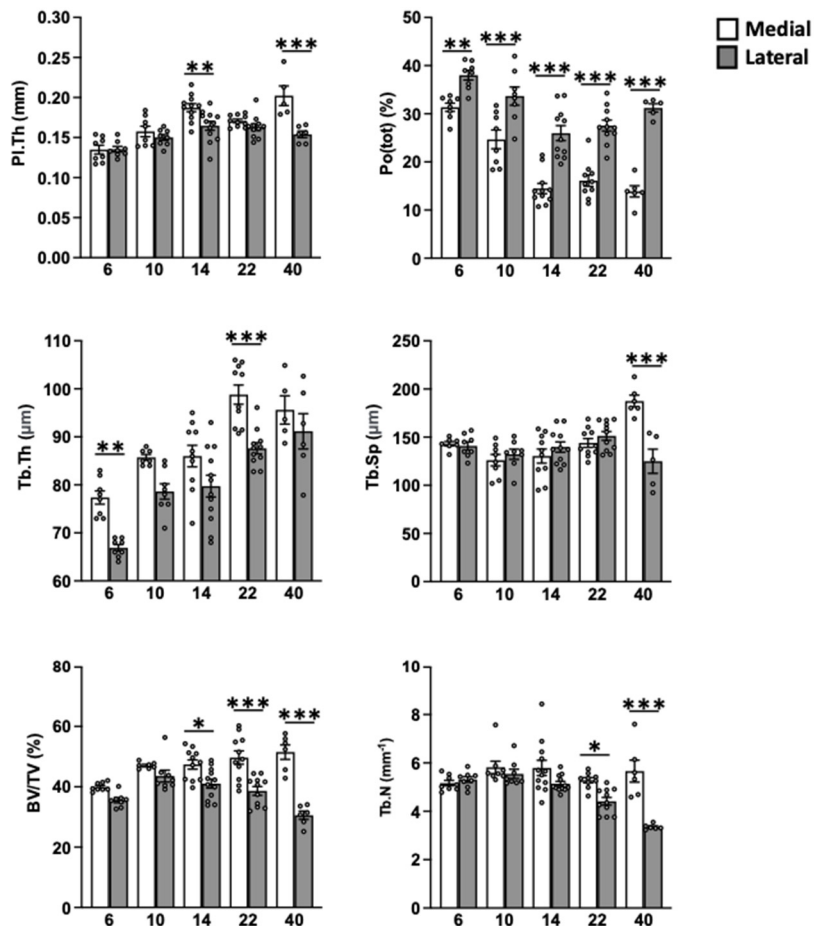

Supplementary Figure 4

**Supplementary Figure S4.** Subchondral bone plate thickness and epiphyseal trabecular bone changed in the medial tibial plateau and lateral tibial plateau.

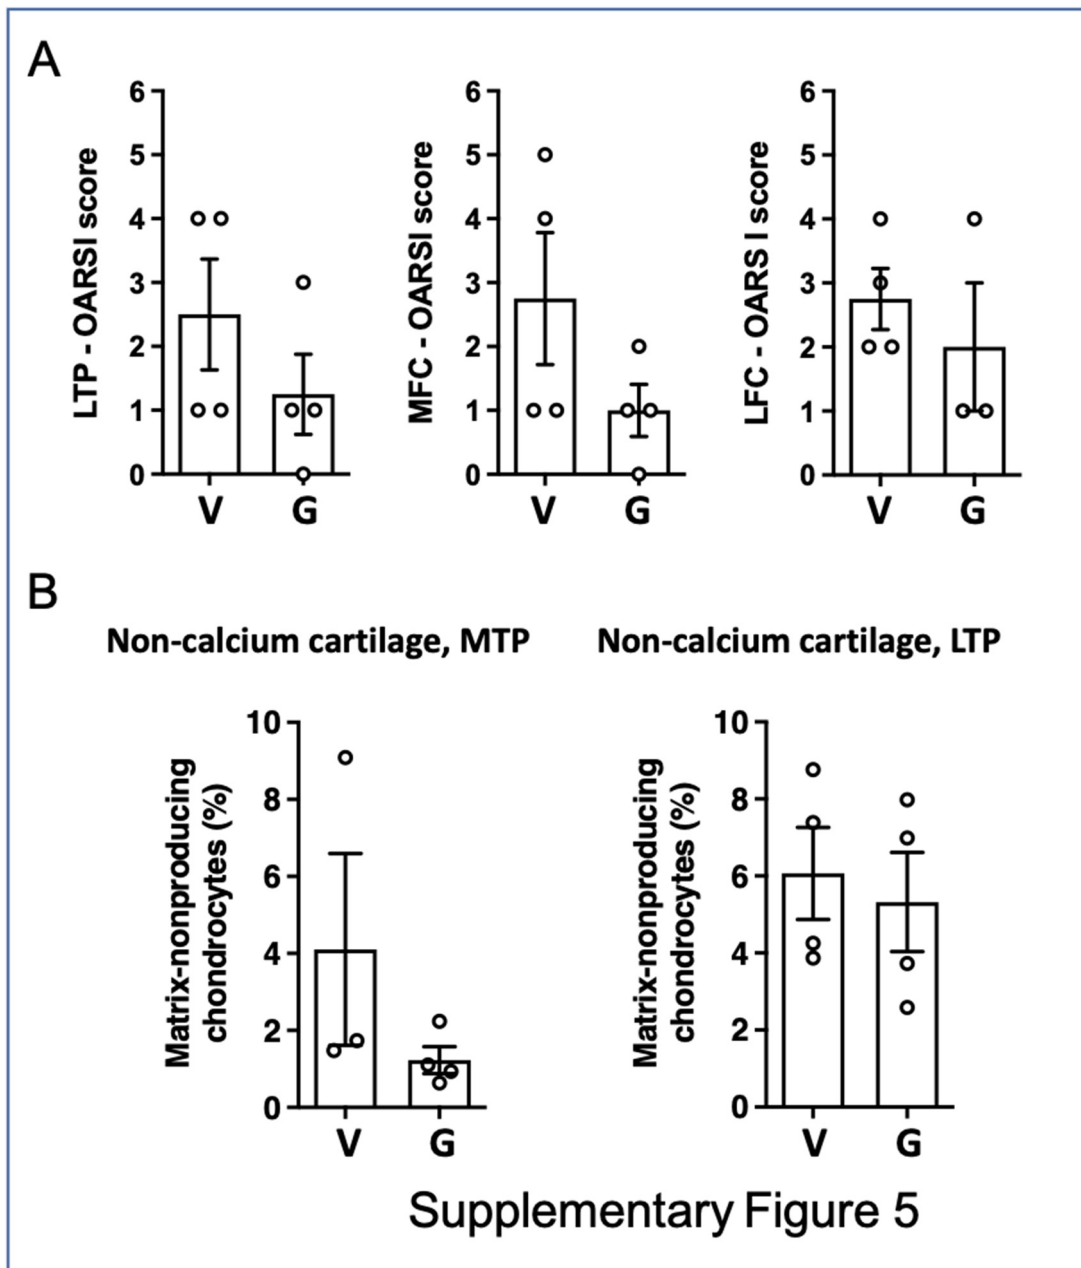

Supplementary Figure S5. GRGDS domain prevents OA progression in STR/ort mice.

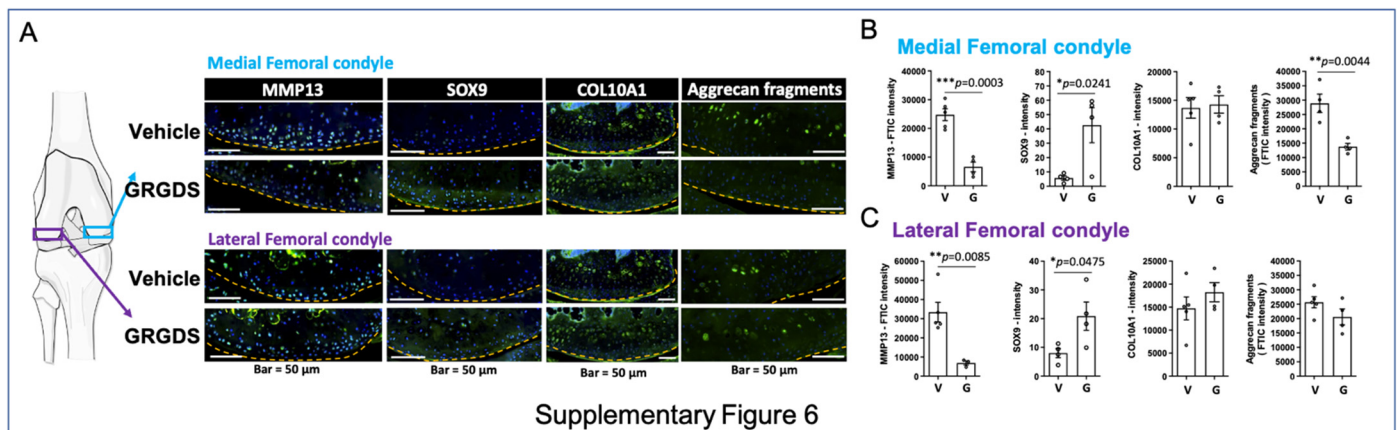

Supplementary Figure S6. GRGDS domain treatment attenuated processes associated with chondrocyte hypertrophy in the expression of MMP-13, Sox9, and aggrecan fragments.

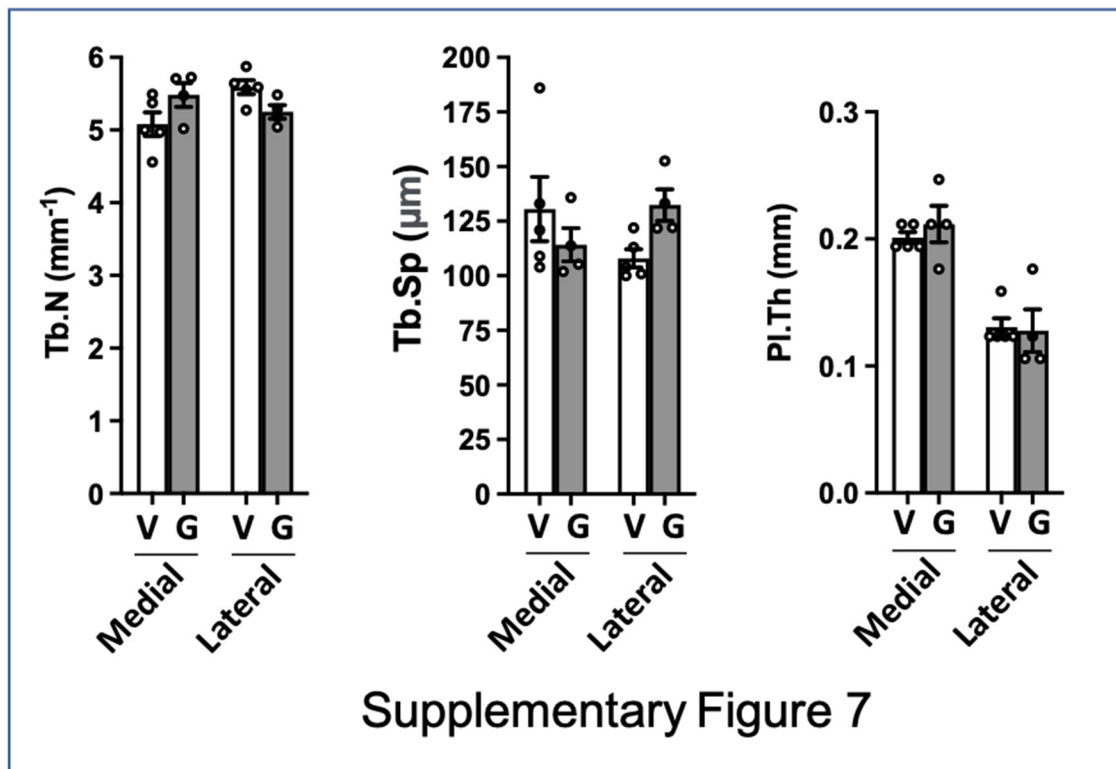

**Supplementary Figure S7.** Effects of GRGDS domain treatment on the bone remodeling in STR/ort knee joints.
